# Supplementary material
Source: PubMed Central journal article supplement (PMC4929391)

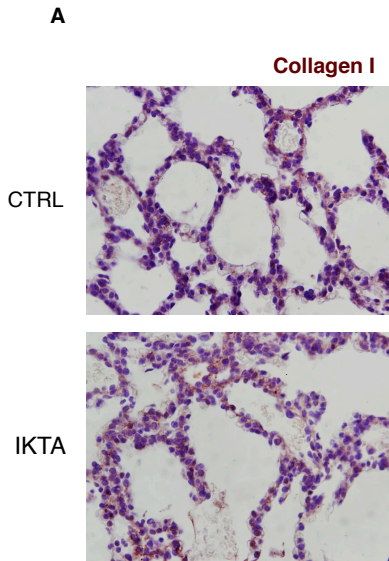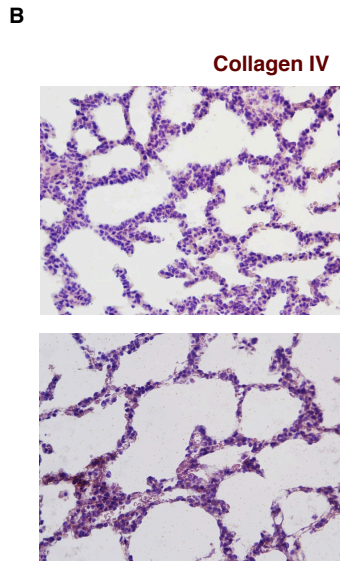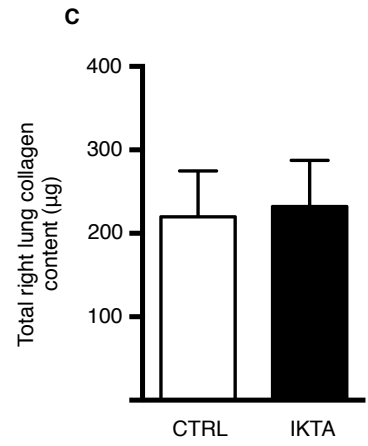

**Supplemental Figure S2**

Supplement: mmc2.pdf [file mmc2.pdf]

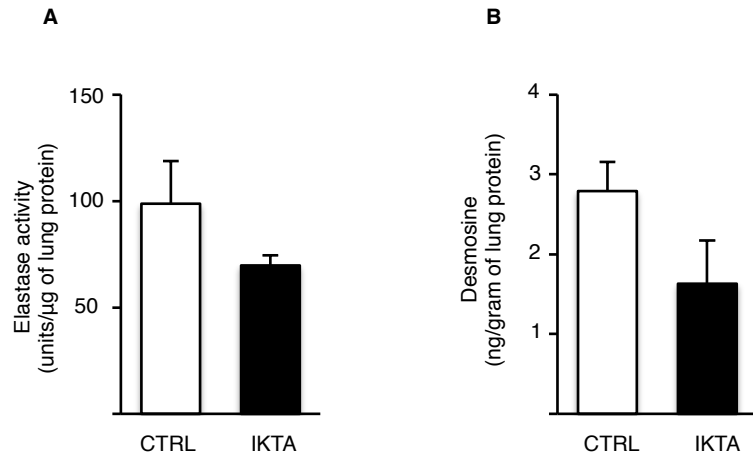

Supplemental Figure S4

Supplement: mmc4.pdf [file mmc4.pdf]
